# Supplementary material for: Assessment of a new genomic classification system in acute myeloid leukemia with a normal karyotype
Source: PubMed Central journal article supplement (PMC5797026; doi:10.18632/oncotarget.23575), 2017-12-22
Supplement: oncotarget-09-4961-s001.pdf [file oncotarget-09-4961-s001.pdf]

## Assessment of a new genomic classification system in acute myeloid leukemia with a normal karyotype

### SUPPLEMENTARY MATERIALS

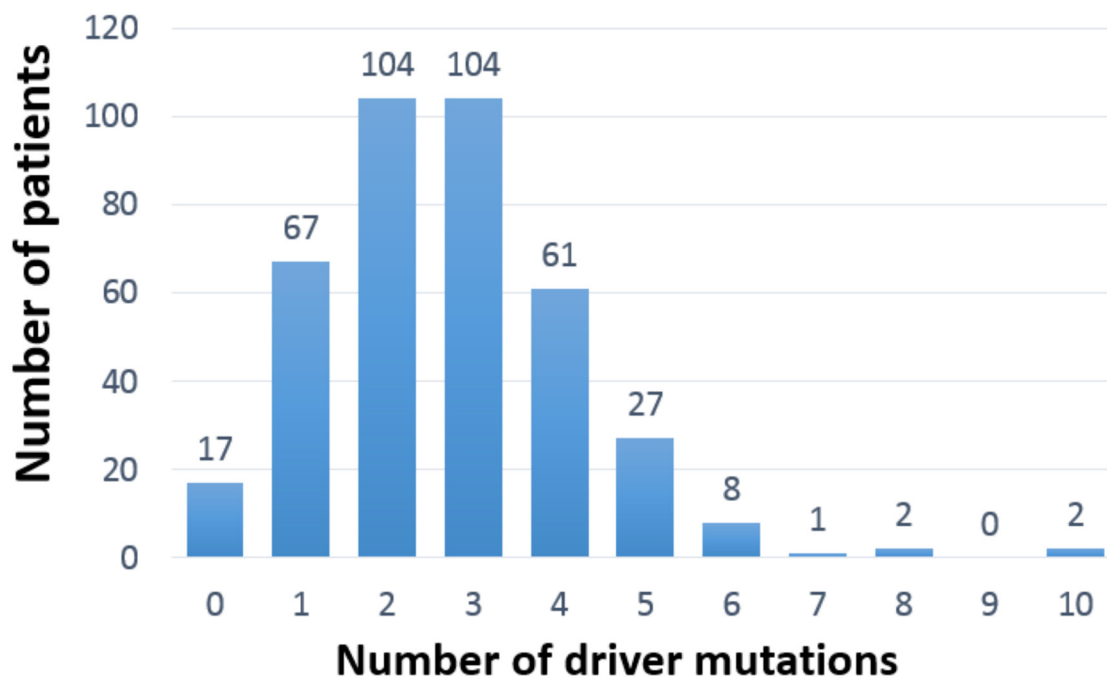

Supplementary Figure 1: Bar plot indicating number of driver events by patient for all patients.

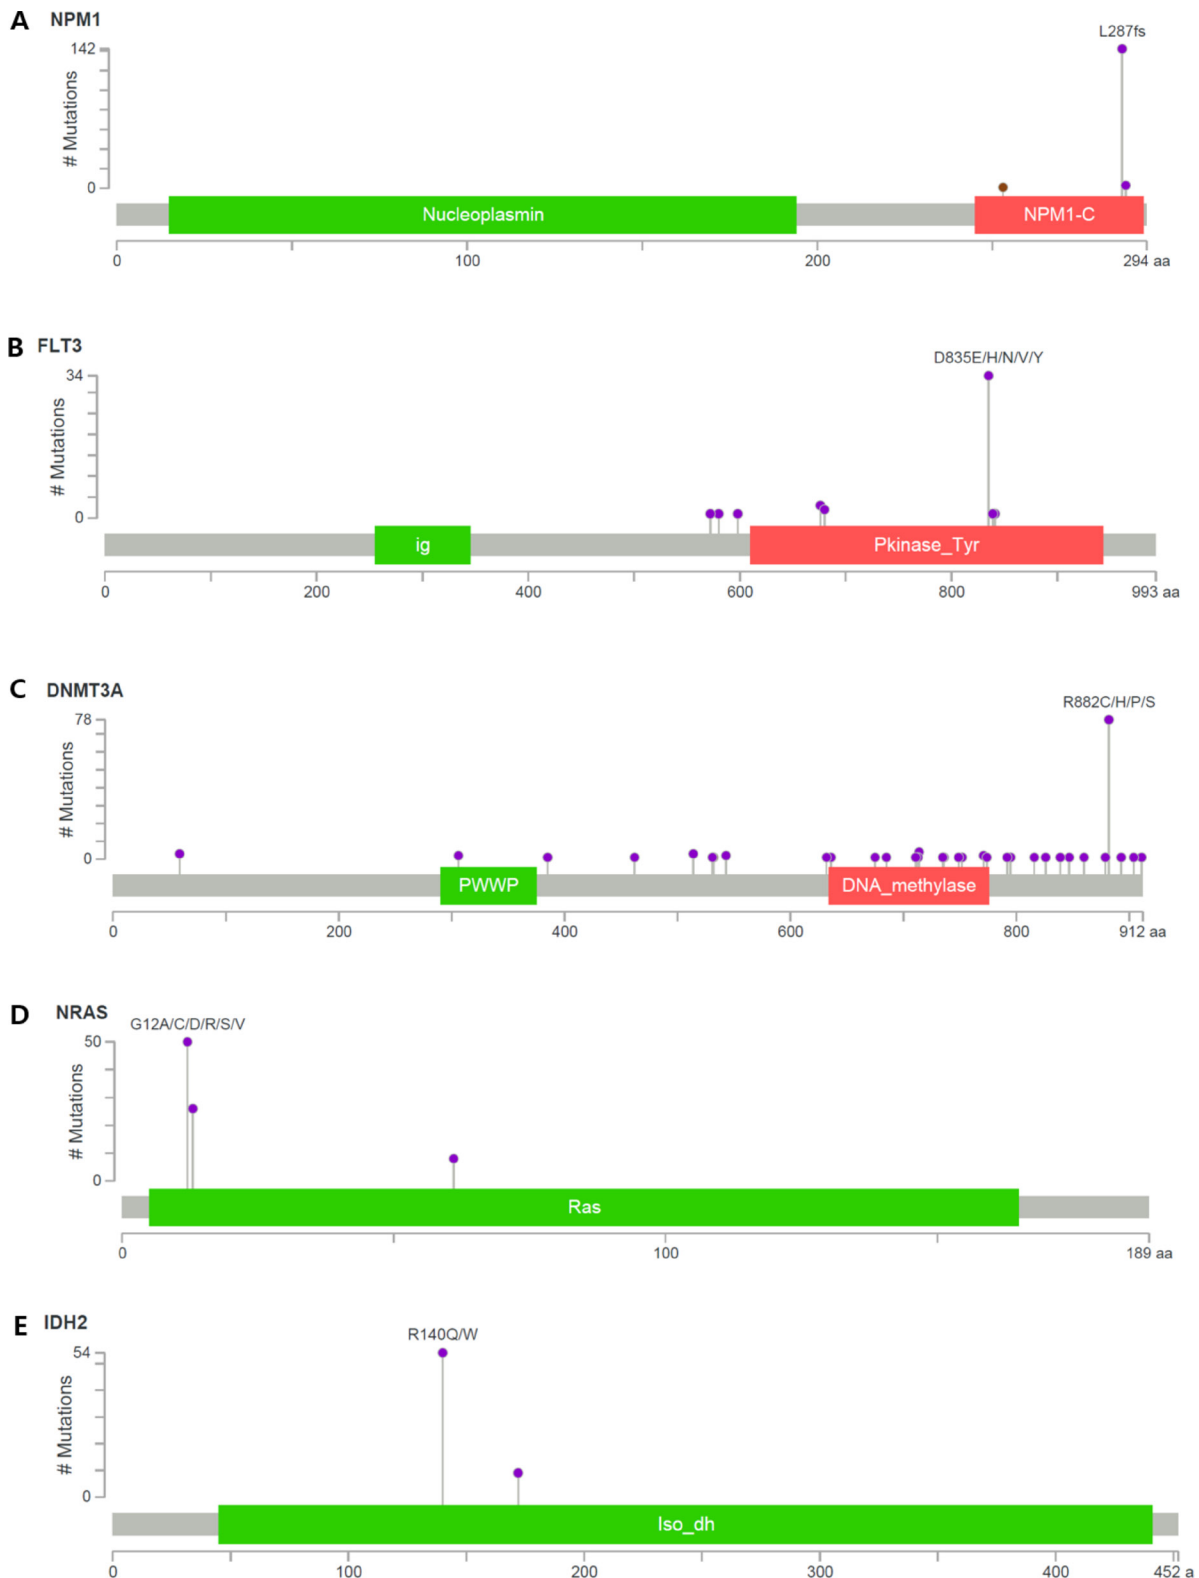

**Supplementary Figure 2 (Continued):** Lollipop plot of the most frequently detected mutations (A-V) including TP53 (W). We described the location of TP53 mutation in W(a); out cohort, W(b); Metzeler’s [Blood 2016] and, W(c); Papaemanuil’s data [NEJM 2016].

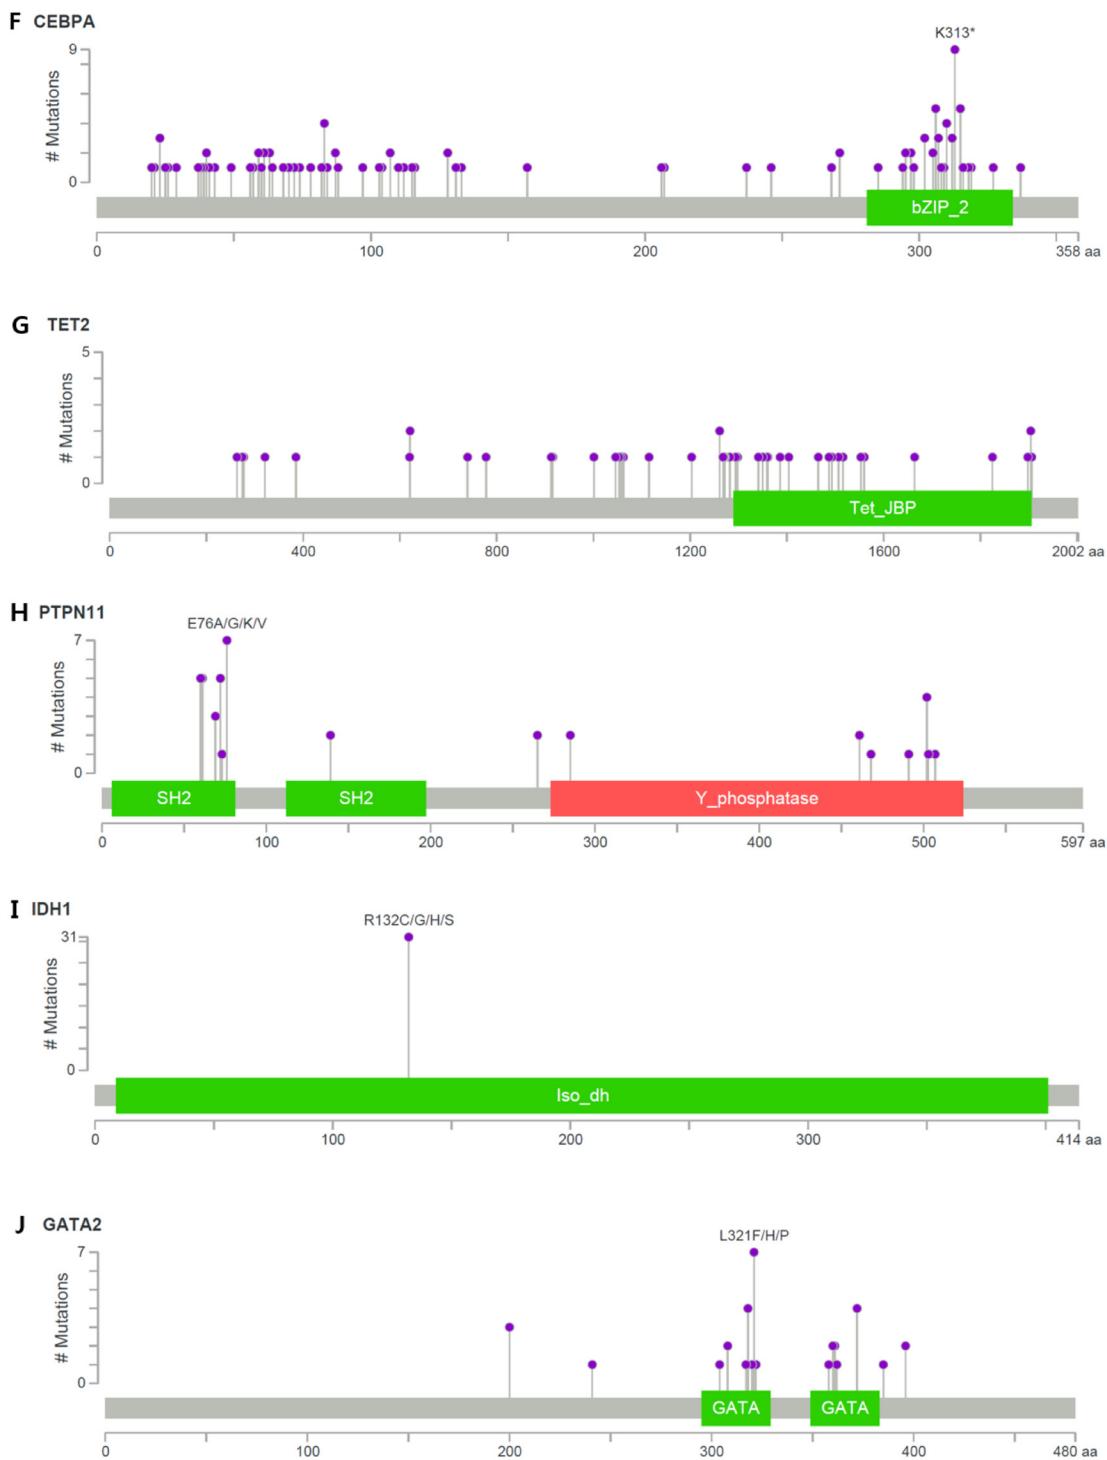

**Supplementary Figure 2:** Lollipop plot of the most frequently detected mutations (A-V) including TP53 (W). We described the location of TP53 mutation in W(a); out cohort, W(b); Metzeler’s [Blood 2016] and, W(c); Papaemanuil’s data [NEJM 2016]. (Continued)

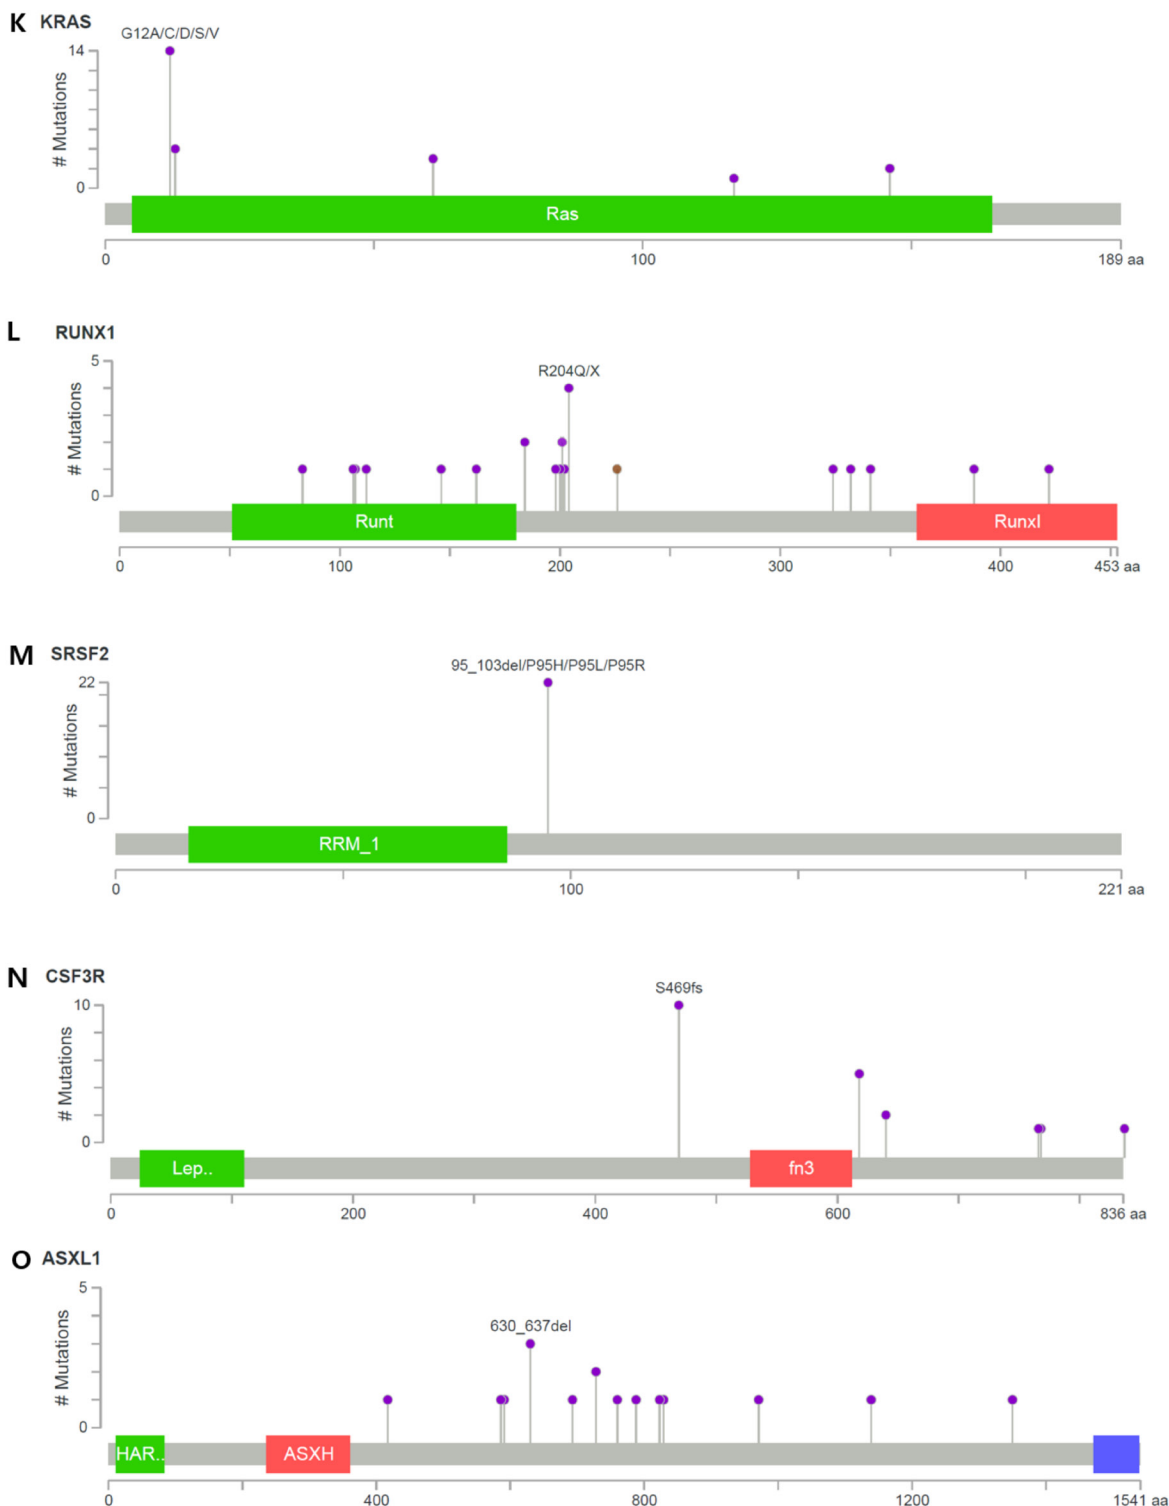

**Supplementary Figure 2:** Lollipop plot of the most frequently detected mutations (A-V) including TP53 (W). We described the location of TP53 mutation in W(a); out cohort, W(b); Metzeler’s [Blood 2016] and, W(c); Papaemanuil’s data [NEJM 2016]. (Continued)

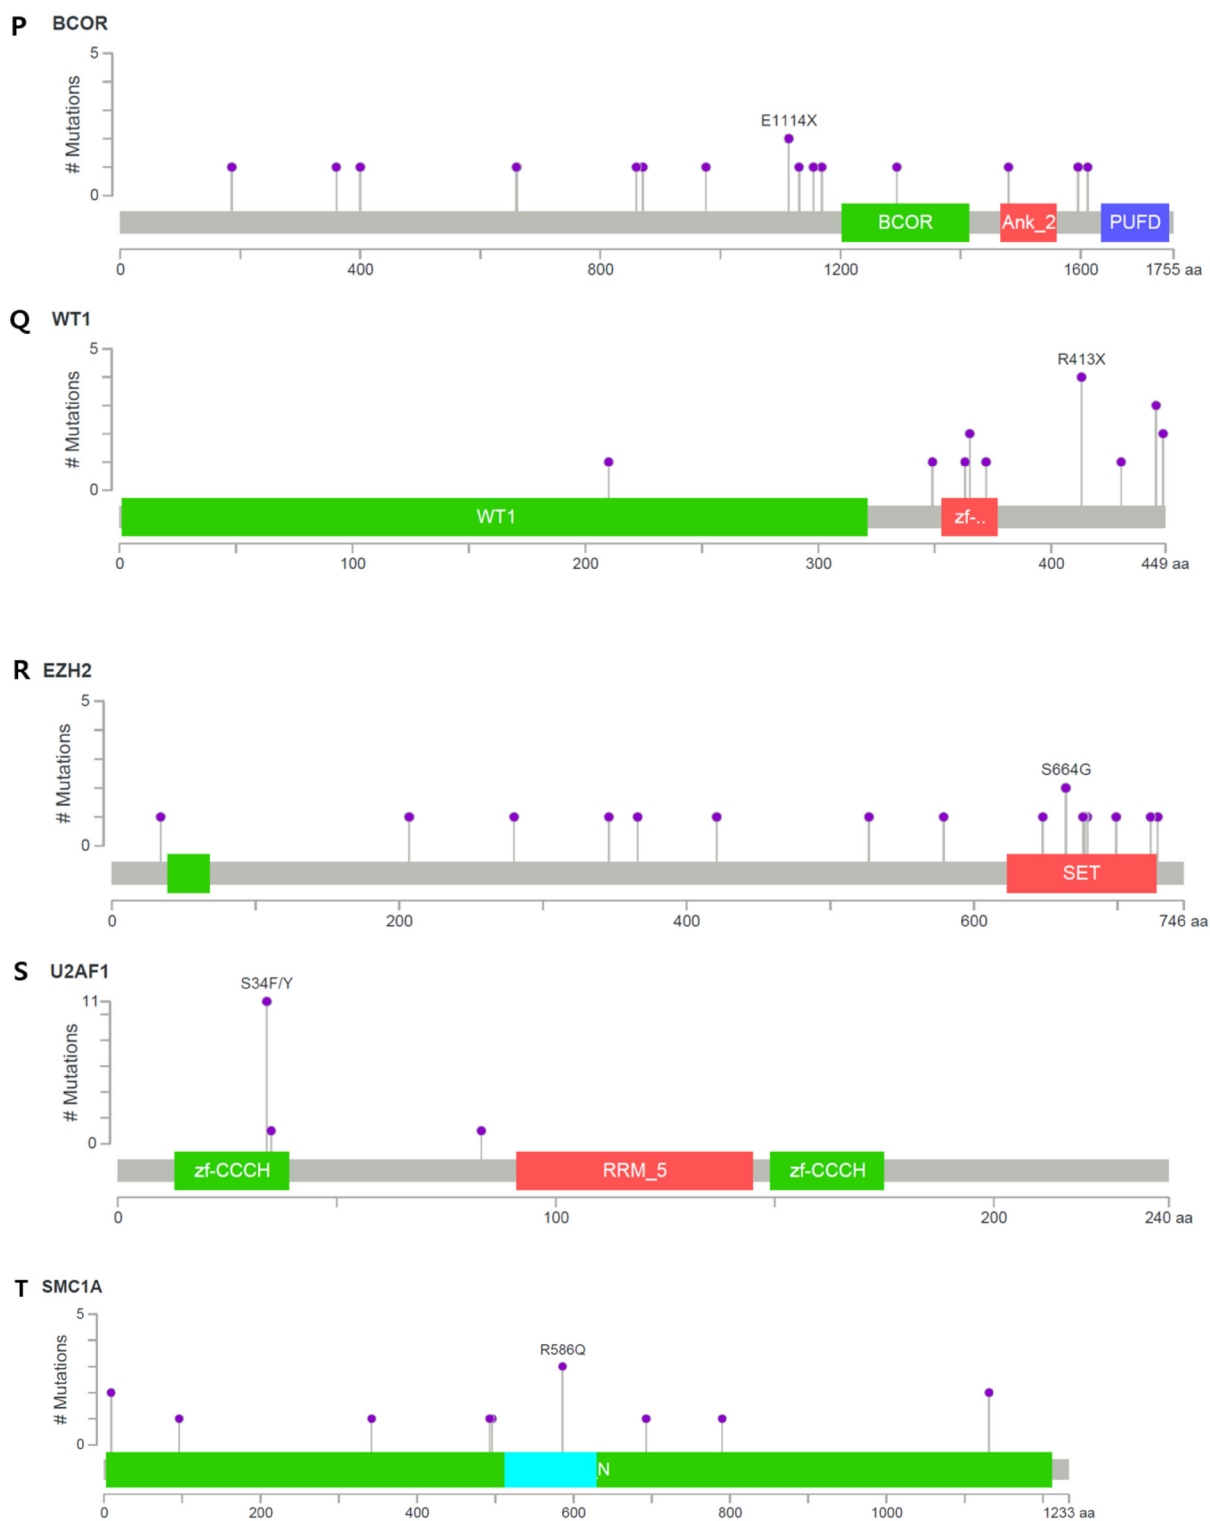

**Supplementary Figure 2:** Lollipop plot of the most frequently detected mutations (A-V) including TP53 (W). We described the location of TP53 mutation in W(a); out cohort, W(b); Metzeler’s [Blood 2016] and, W(c); Papaemanuil’s data [NEJM 2016]. (Continued)

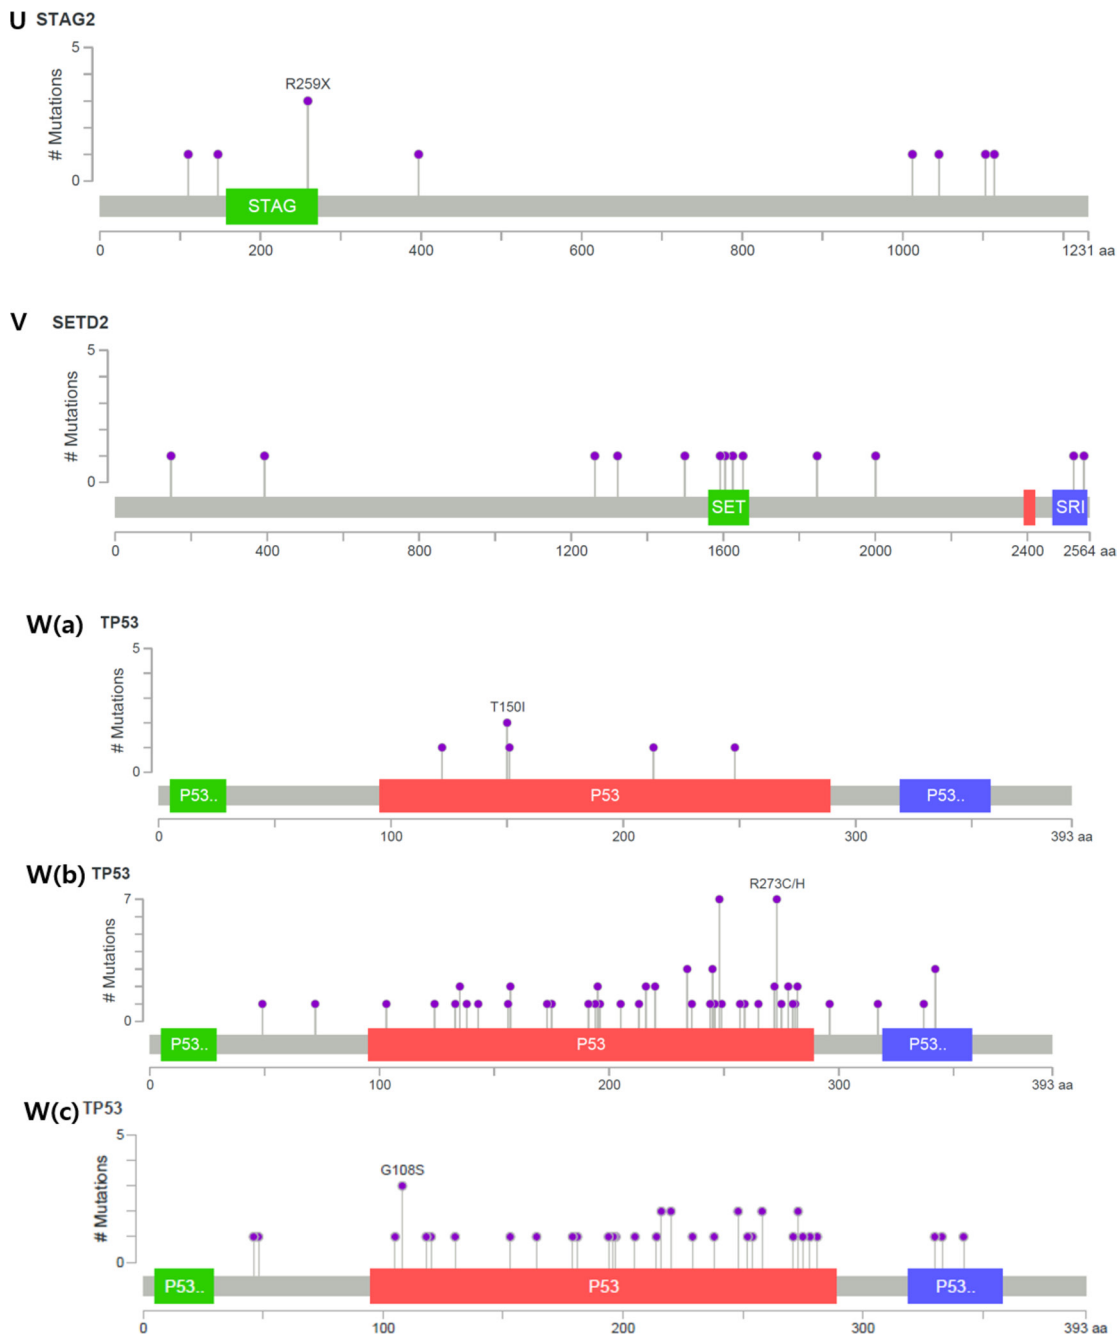

**Supplementary Figure 2:** Lollipop plot of the most frequently detected mutations (A-V) including *TP53* (W). We described the location of *TP53* mutation in W(a); out cohort, W(b); Metzeler’s [Blood 2016] and, W(c); Papaemanuil’s data [NEJM 2016].

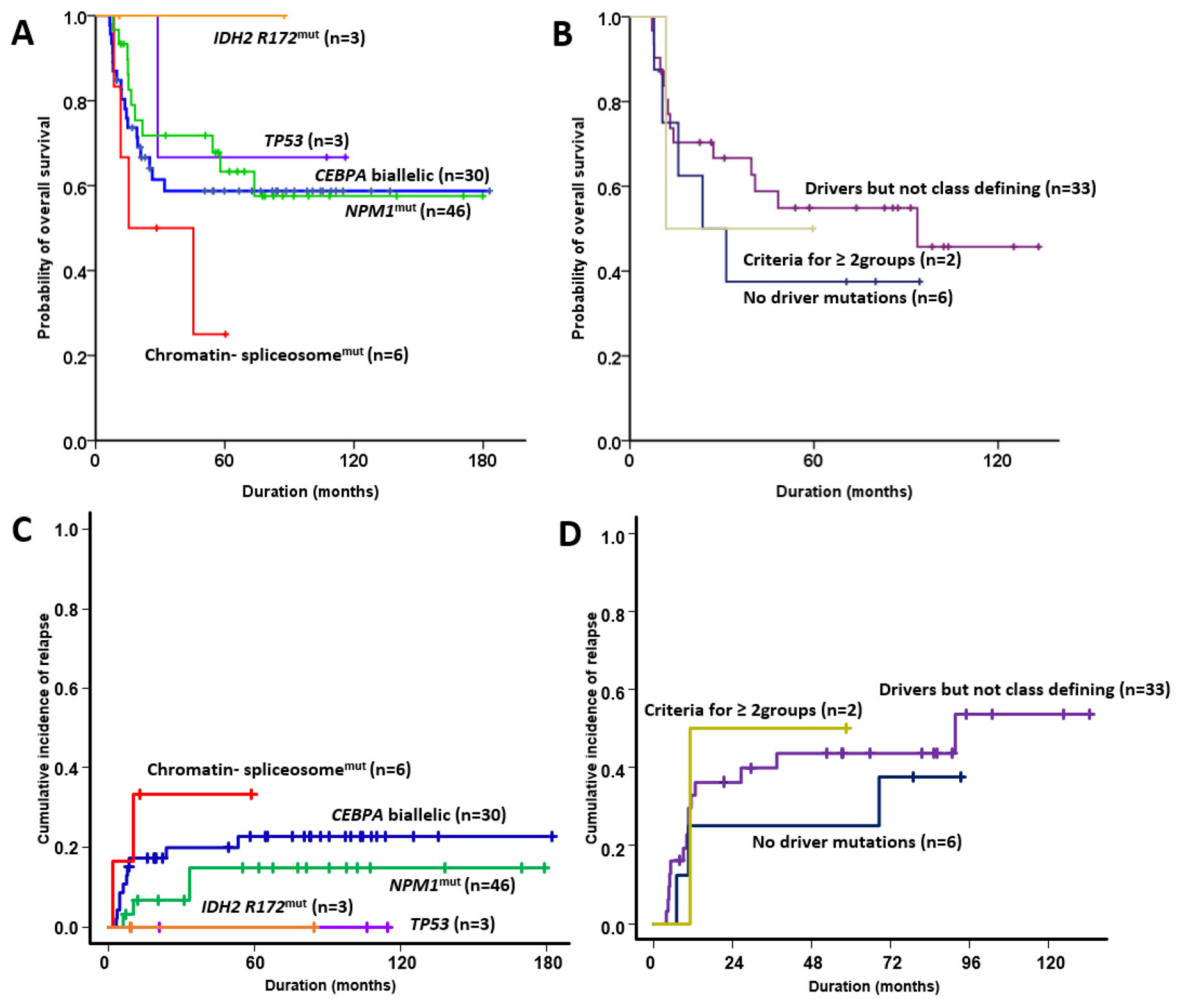

Supplementary Figure 3: Prognostic impact according to genomic classification in patients with normal-karyotype acute myeloid leukemia who underwent allogeneic stem cell transplantation. (A, B) overall survival, and (C, D) relapse incidence.

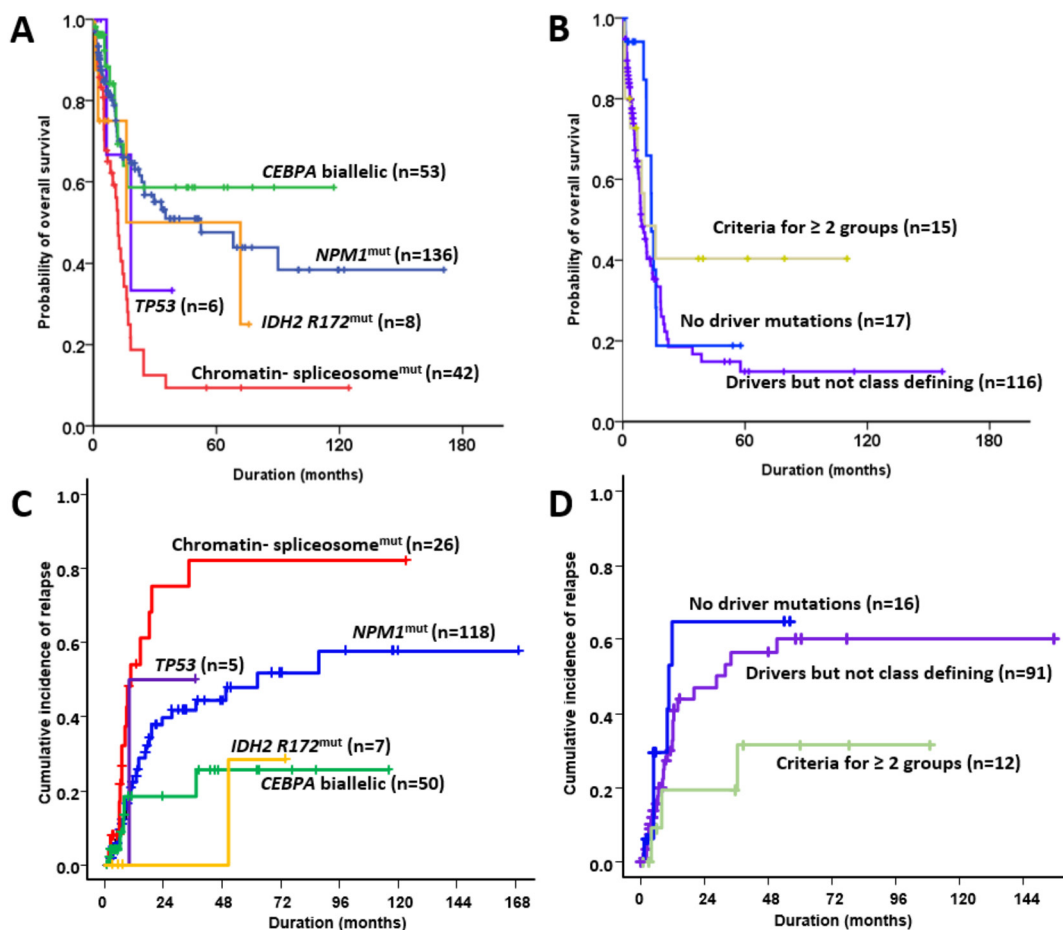

Supplementary Figure 4: Prognostic impact according to genomic classification in patients with normal-karyotype acute myeloid leukemia (patients undergoing allogeneic SCT were censored at the time of transplantation). (A, B) overall survival, and (C, D) relapse incidence.



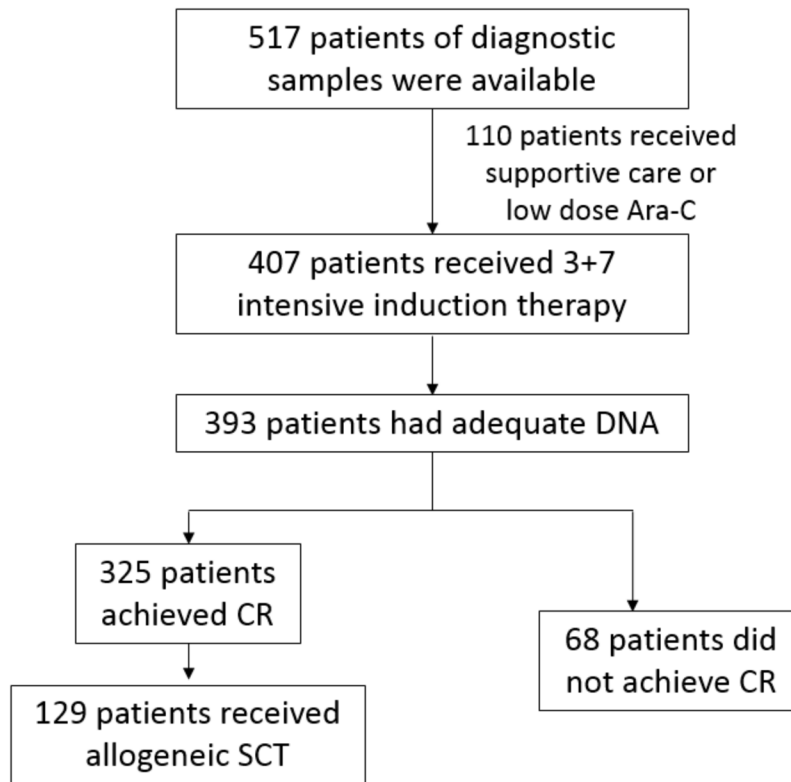

**Supplementary Figure 5: Flowchart on patients' selection.** Abbreviation: CR, complete remission; SCT, stem cell transplantation.

**Supplementary Table 1: Gene panels of targeted deep sequencing and gene coverage.**

See Supplementary File 1

**Supplementary Table 2: Clinical characteristics of 129 patients with normal-karyotype acute myeloid leukaemia who received allogeneic stem cell transplantation**

|                                                              | No. of patients         | %    |
|--------------------------------------------------------------|-------------------------|------|
| <b>Gender, male</b>                                          | 64                      | 49.6 |
| <b>Age, Median (range, years)</b>                            | 49 (15-64)              |      |
| <b>WBC, Median value (<math>\times 10^9/L</math>), range</b> | 25.7 (0.9-397.2)        |      |
| < 30.0 $\times 10^9/L$                                       | 69                      | 53.5 |
| $\geq 30.0\times 10^9/L$                                     | 60                      | 46.5 |
| <b>Donor type</b>                                            |                         |      |
| Matched related                                              | 78                      | 60.5 |
| Others                                                       | 51                      | 39.5 |
| <b>Source</b>                                                |                         |      |
| Bone marrow                                                  | 26                      | 20.2 |
| PBSC                                                         | 99                      | 79.8 |
| <b>Conditioning</b>                                          |                         |      |
| Myeloablative                                                | 109                     | 84.5 |
| Reduced intensity                                            | 20                      | 15.5 |
| <b>GVHD prophylaxis</b>                                      |                         |      |
| CsA $\pm$ MTX                                                | 85                      | 65.9 |
| FK506 $\pm$ MTX                                              | 44                      | 34.1 |
| <b>Use of T cell depletion</b>                               |                         |      |
| Yes                                                          | 33 (23/10) <sup>†</sup> | 25.6 |
| No                                                           | 96                      | 74.4 |

<sup>†</sup> 23 patients received anti-thymocyte globulin and 10 patients received alemtuzumab for T cell depletion.

Abbreviations: WBC, white blood cells; PBSC, peripheral blood stem cell; GVHD, graft-versus-host disease; CsA, cyclosporine A; MTX, methotrexate.
